# Supplementary material for: Photoactivatable substrates show diverse phenotypes of leader cells in collective migration when moving along different extracellular matrix proteins
Source: Royal Society of Chemistry journal article supplement (doi:10.1039/d4bm00225c), 2024-01-01
Supplement: d4bm00225c3.pdf [file d4bm00225c3.pdf]

# **Photoactivatable Substrates Show Diverse Phenotypes of Leader Cells in Collective Migration When Moving Along Different Extracellular Matrix Proteins**

Shimaa A. Abdellatef<sup>1\*</sup>, Francesca Bard<sup>1,2</sup>, Jun Nakanishi<sup>1,3,4\*</sup>

<sup>1</sup>Mechanobiology group, Research Center for Macromolecules and Biomaterials, National Institute for Materials Science (NIMS), Tsukuba, Japan.

<sup>2</sup>Dept. of Mater. Sci. Eng. Cornell Uni., USA.

<sup>3</sup>Waseda University Graduate School of Advanced Science and Engineering Department of Nanoscience and Engineering.

<sup>4</sup>Tokyo University of Science, advanced Graduate School of Engineering Materials Innovation Engineering.

\*Corresponding Authors:

[ABDELALEEM.shimaa@nims.go.jp](mailto:ABDELALEEM.shimaa@nims.go.jp) ; [NAKANISHI.Jun@nims.go.jp](mailto:NAKANISHI.Jun@nims.go.jp)

Keywords: Collective cell migration, leader cells, ECM proteins, Collagen I, Laminin, Integrin  $\beta$ 1

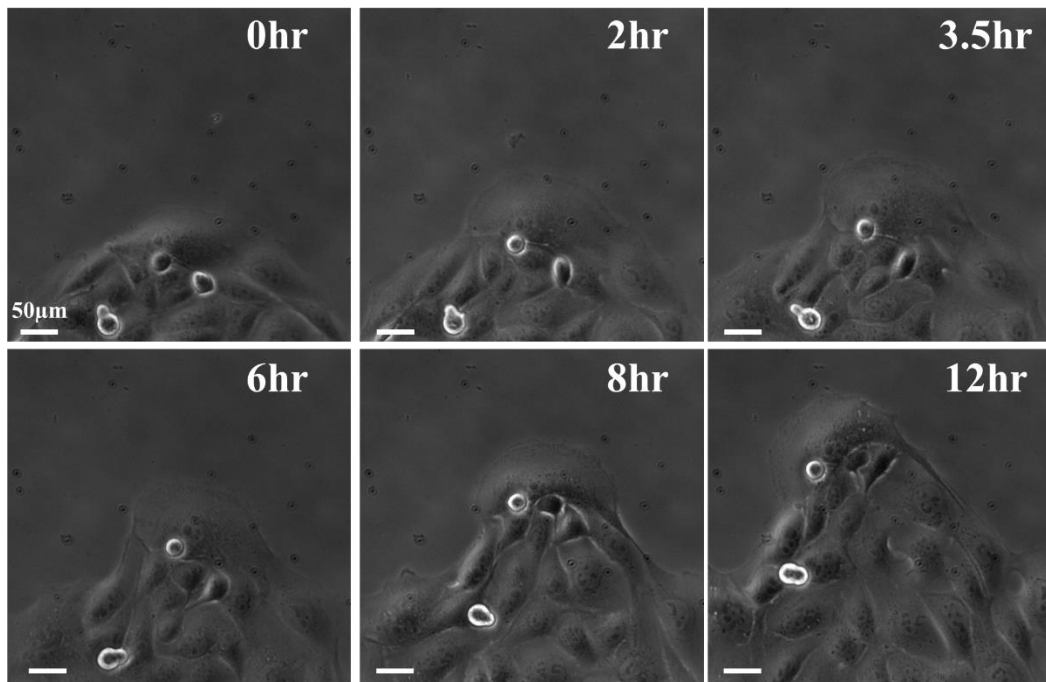

Figure S1: Phase contrast images show the appearance of a leader cell from the edge of a circular cluster and its migration for various hours.

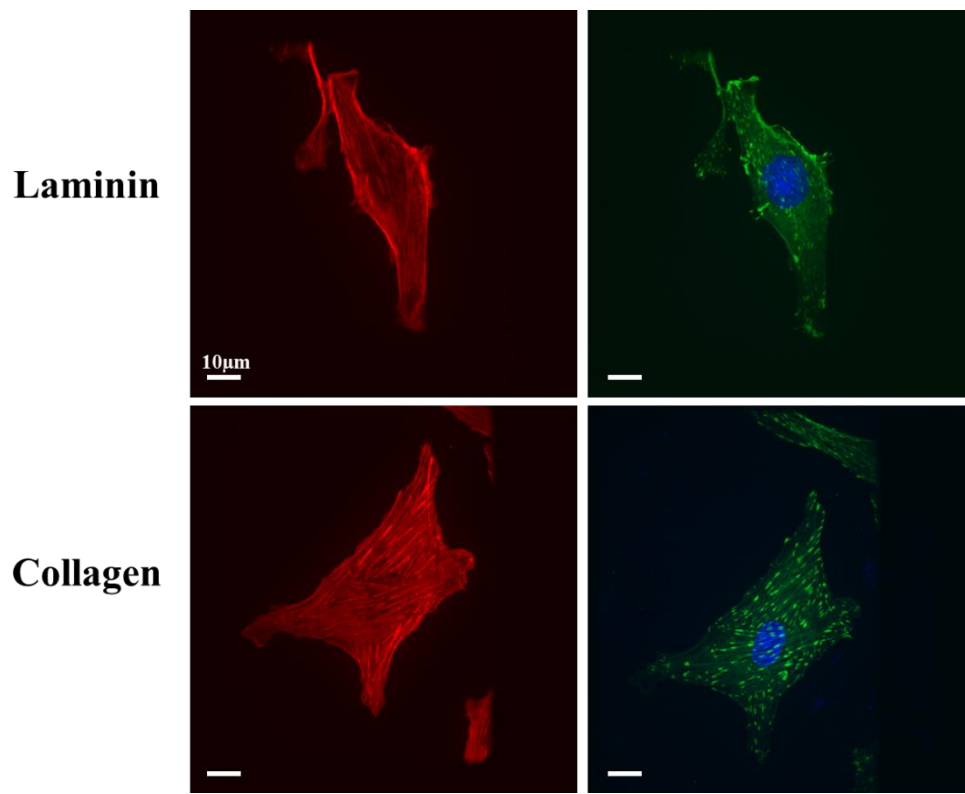

Figure S2: Fluorescence images of a single MDCK cell stained for vinculin (green), actin (red), and nucleus (blue) cultured in laminin and collagen-coated surfaces after photoirradiation.

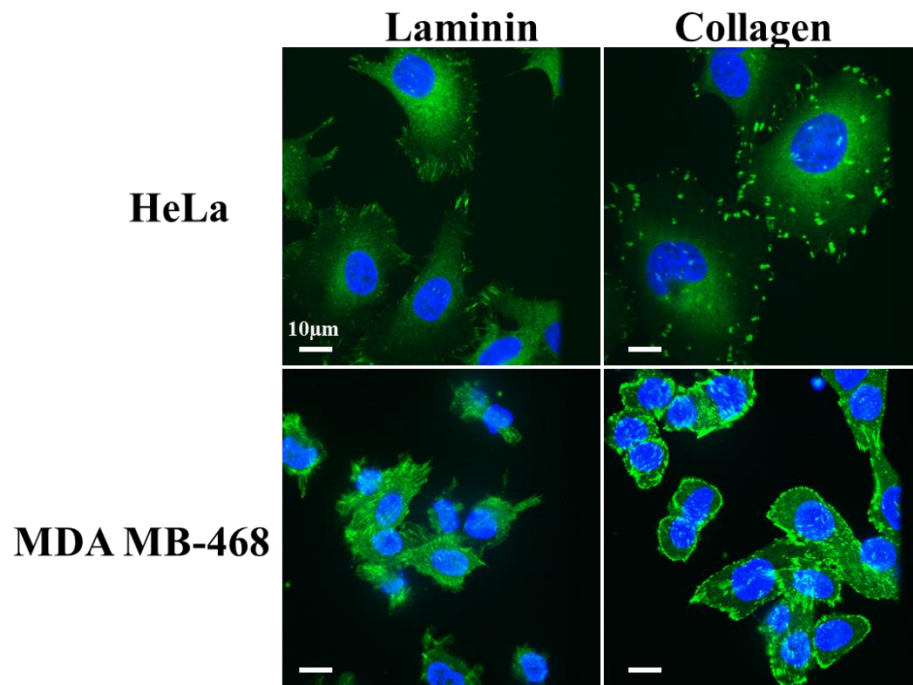

Figure S3: Fluorescence images of HeLa and MDA MB-468 cells stained for vinculin (green) and, nucleus (blue) cultured in laminin and collagen.

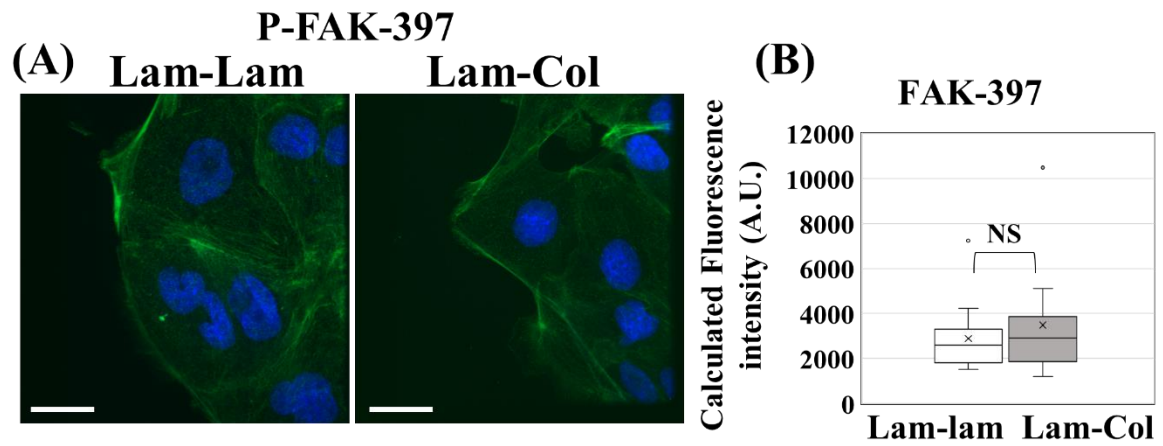

Figure S4: (A) Fluorescence images of Leader cells for p-FAK-397 (green), and nucleus (blue) after their migration in laminin-Laminin and Laminin-collagen. (B) Calculated fluorescence intensity of p-FAK-397 of leader cells after their migration in laminin-laminin and Laminin-collagen (N= 11 cells).

Movie-1: Collective migration and cluster expansion for MDCK on surfaces of laminin-laminin, laminin-collagen, collagen-collagen, and collagen-laminin.

Movies-2: Collective migration and cluster expansion for MDCK cells on surfaces laminin-laminin and laminin-collagen with and without an AIIB2 blocking antibody.
